# Supplementary material for: Mitofusin-2 Negatively Regulates Melanogenesis by Modulating Mitochondrial ROS Generation
Source: MDPI journal article supplement (doi:10.3390/cells11040701), 2022-02-16

## Supplementary data

**Figure 1A. MFN2 protein expression in LD pigmentation model**

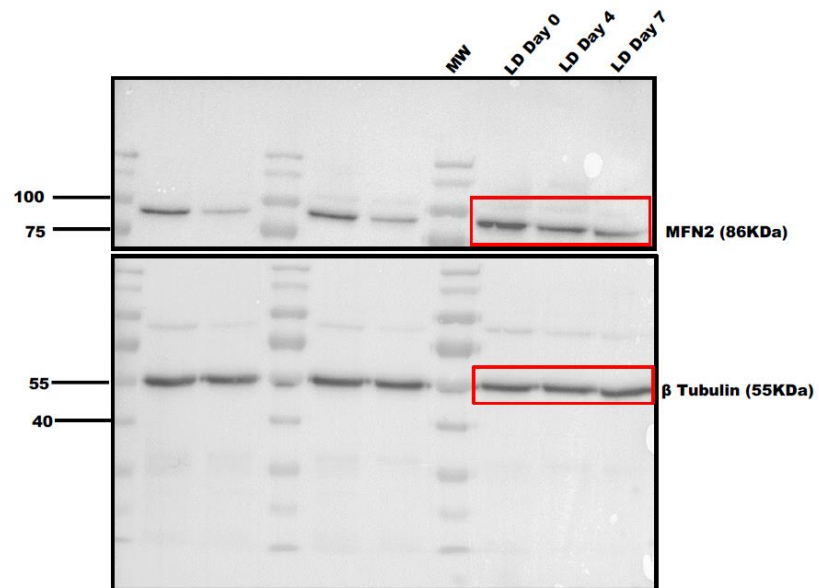

**Figure 1C. MFN2 protein expression in LP-DP primary human melanocytes**

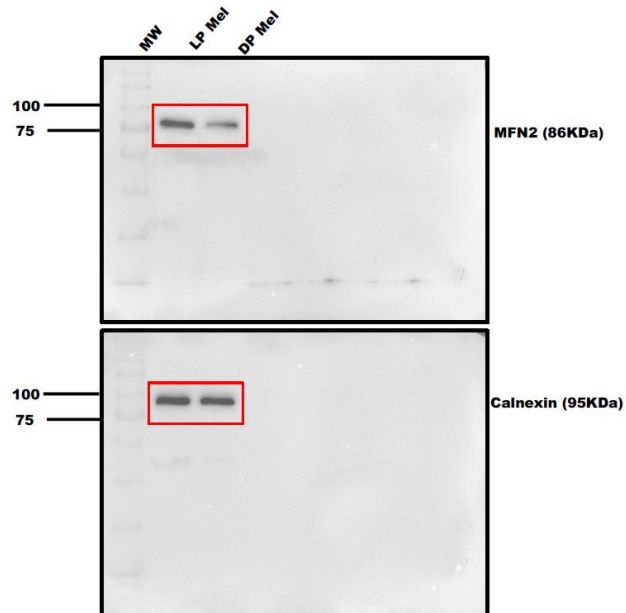

**Figure 2A. siRNA based silencing of MFN2 in B16 cells**

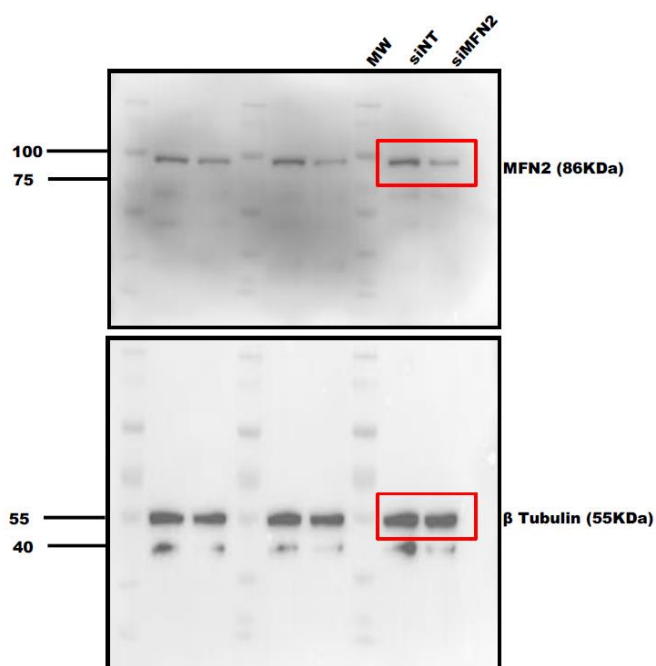

**Figure 2C. shRNA mediated stable knockdown of MFN2 in B16 cells**

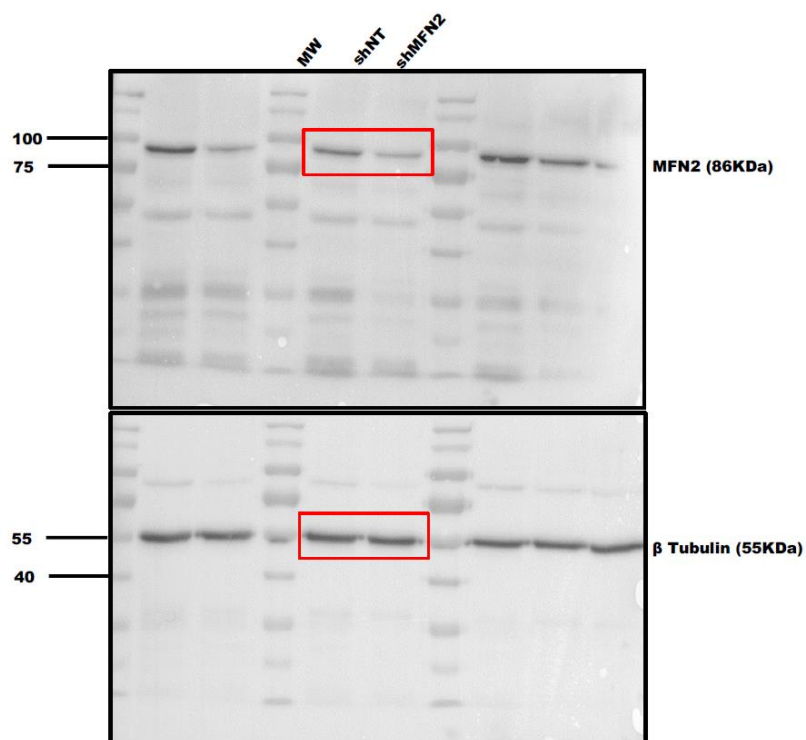

**Figure 3A. Ectopic expression of YFP tagged human MFN2 in shMFN2 stable B16 cells**

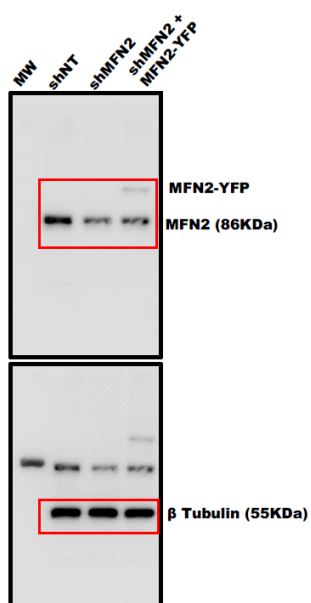

**Figure 5A. Protein expression of Gp100 in shNT and shMFN2 stable cells on LD Day7**

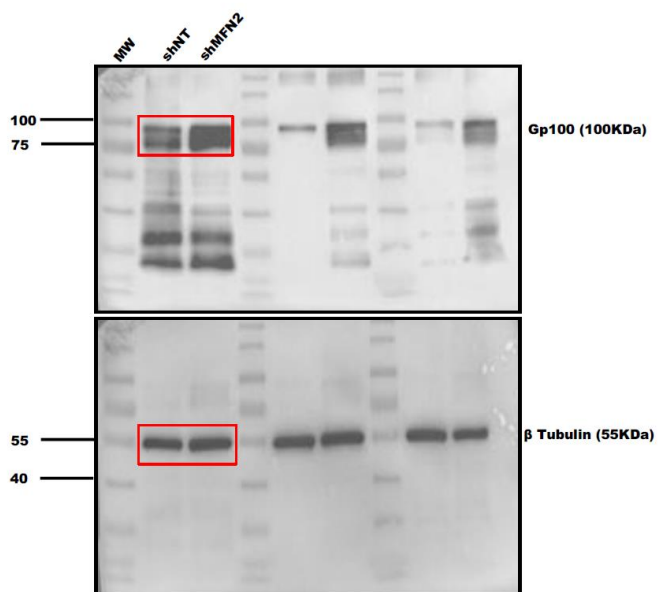

**Figure 5B. DOPA assay for tyrosinase enzyme activity and protein expression of tyrosinase in shNT and shMFN2 stable cells**

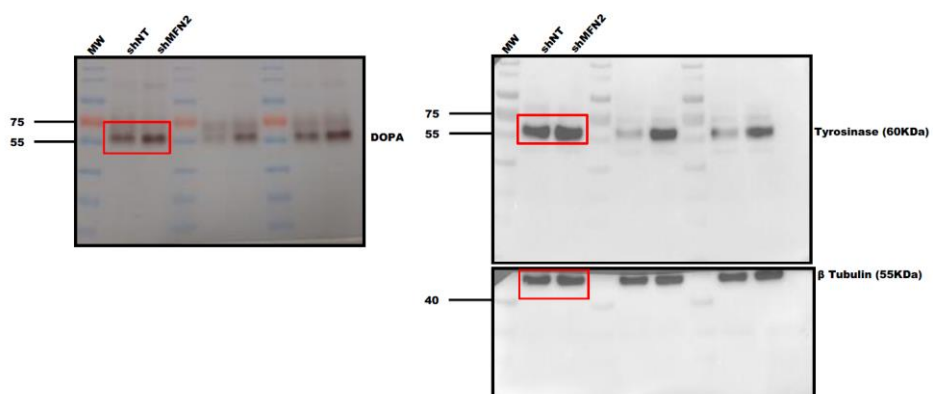

**Figure 5C. Protein expression of DCT in shNT and shMFN2 stable cells**

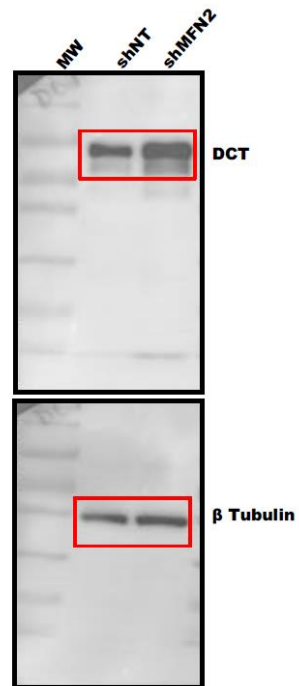

**Figure 5D. DOPA assay for tyrosinase enzyme activity and protein expression of tyrosinase in shNT, shMFN2 and shMFN2+ MFN2-YFP cells**

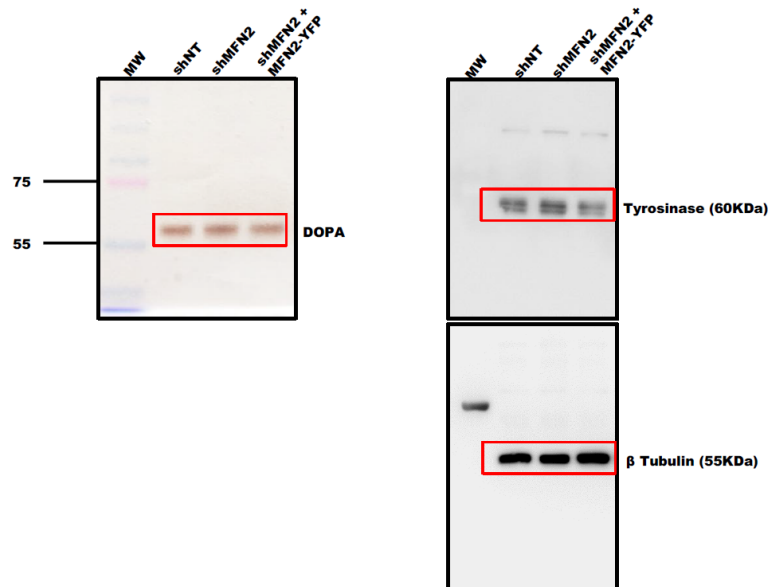

**Figure 5E. Protein expression of Gp100 in shNT, shMFN2 and shMFN2+ MFN2-YFP cells**

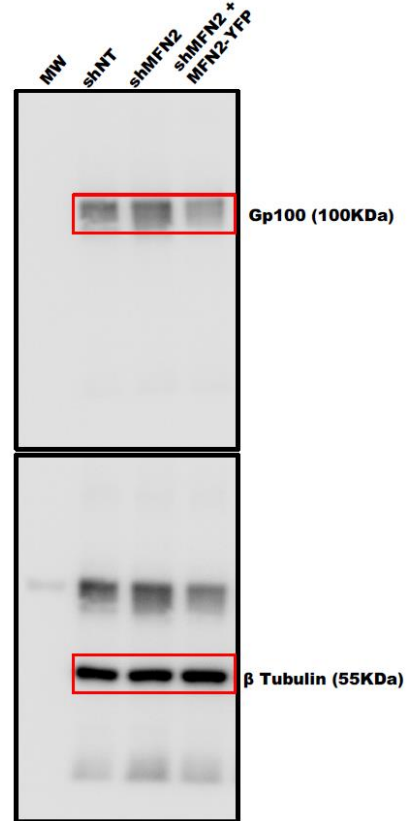

**Figure 5F. Protein expression of DCT in shNT, shMFN2 and shMFN2+ MFN2-YFP cells**

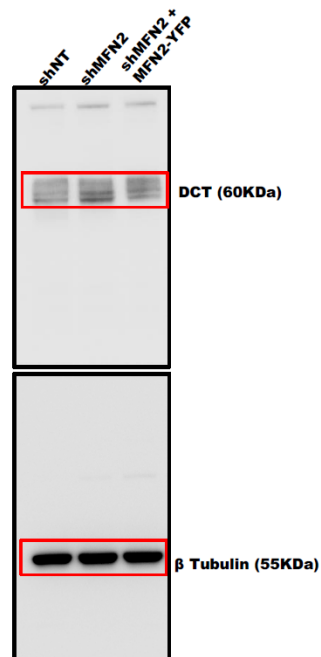

**Figure 6A. DRP1 protein expression in LD pigmentation model**

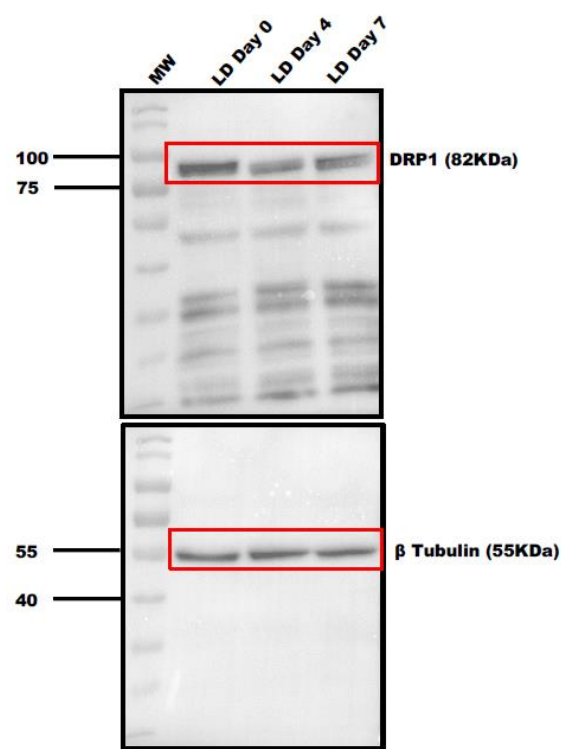

**Figure 6C. DRP1 protein expression in LP-DP primary human melanocytes**

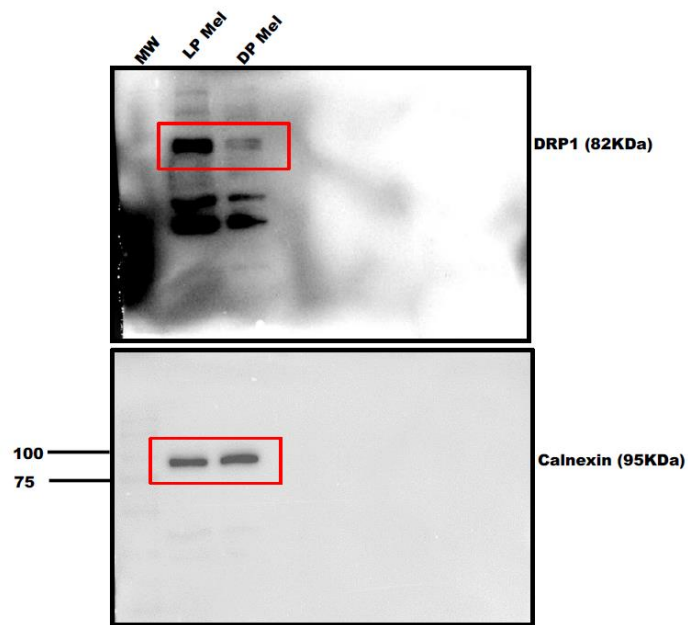

**Figure 6E. MFN1 protein expression in LD pigmentation model**

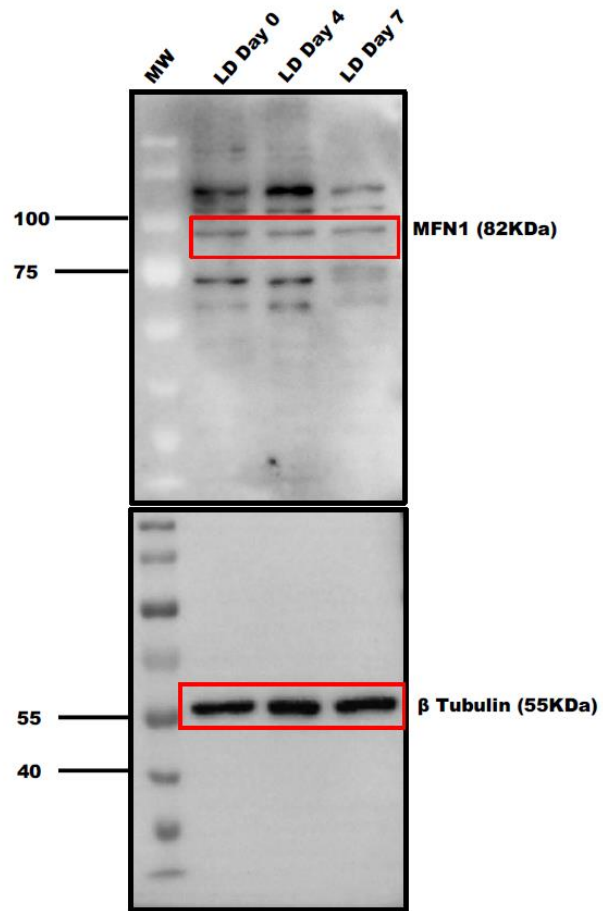

**Figure 6G. MFN1 protein expression in LP-DP primary human melanocytes**

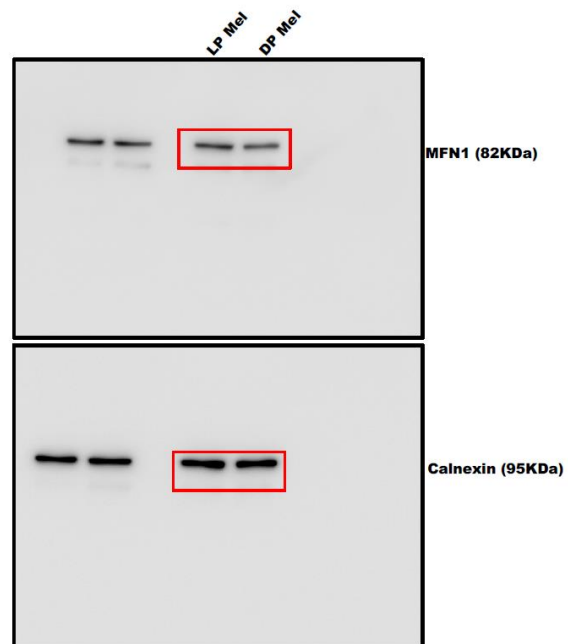

**Figure 7A. siRNA based silencing of DRP1 in B16 cells**

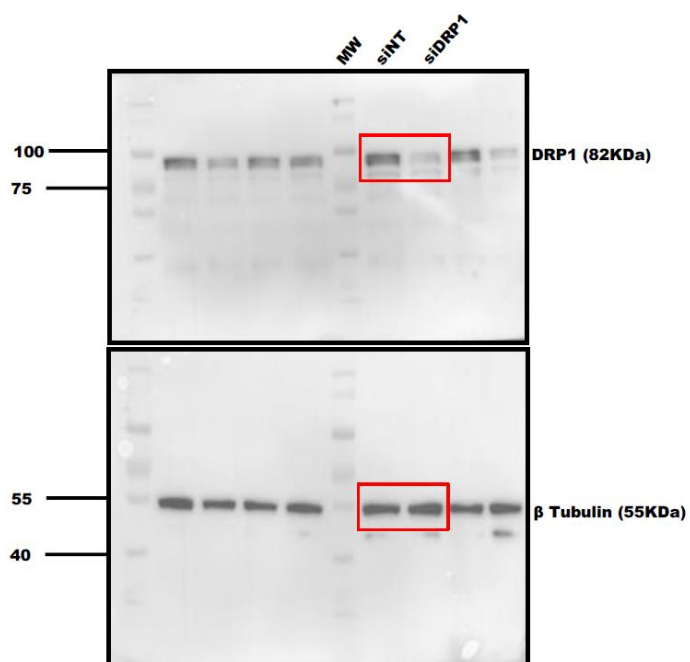

**Figure 7C. shRNA mediated knockdown of DRP1 in B16 cells**

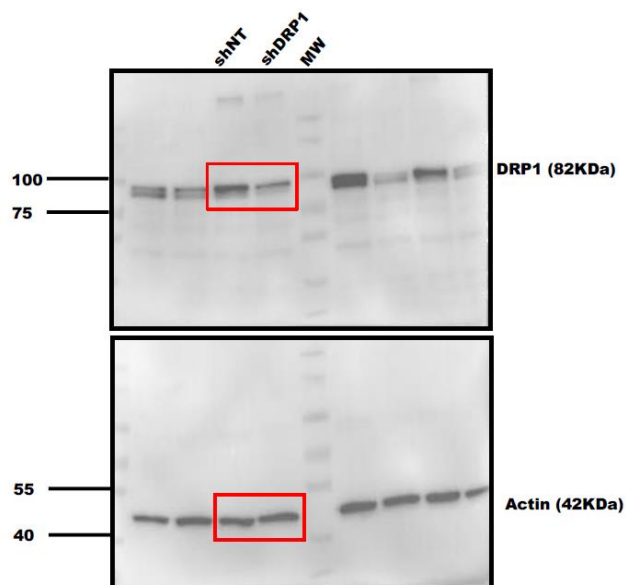

Supplement: s1 [file s1]
