# Supplementary material for: Mitofusin-2 Negatively Regulates Melanogenesis by Modulating Mitochondrial ROS Generation
Source: MDPI journal article supplement (doi:10.3390/cells11040701), 2022-02-16
Supplement: s1 [file s1]

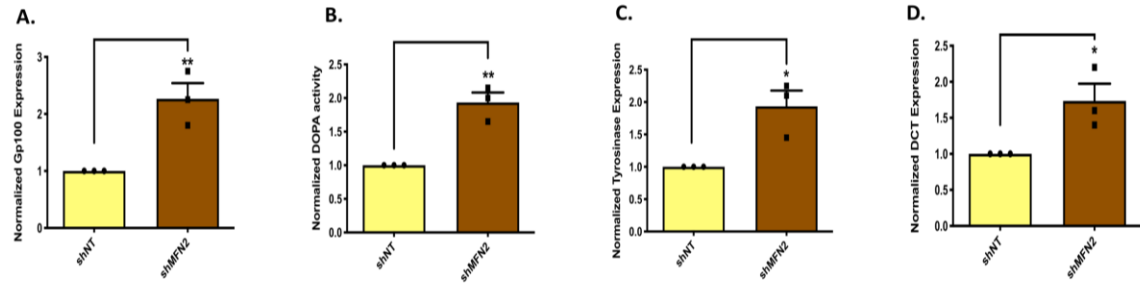

**Supplementary Figure 1. MFN2 regulates melanogenic enzyme expression and activity.** **A.** Quantitation of densitometric analysis of Gp100 expression in shNT and shMFN2 cells on LD Day7 (N = 3). **B.** Quantitative analysis of tyrosinase activity in shNT and shMFN2 cells on LD Day7 (N = 3). **C.** Quantitation of densitometric analysis of tyrosinase expression in shNT and shMFN2 cells on LD Day7 (N = 3). **D.** Densitometric analysis of DCT expression in shNT and shMFN2 cells on LD Day7 (N = 3). Data presented are Mean ± S.E.M. (\*  $p < 0.05$ ; \*\*  $p < 0.01$ ; Unpaired Student's  $t$ -test was performed for statistical analysis).
